# Supplementary material for: Three-Dimensional Genome Architecture Influences Partner Selection for Chromosomal Translocations in Human Disease
Source: PubMed Central journal article supplement (PMC3460994; doi:10.1371/journal.pone.0044196), 2012-09-28
Supplement: pone.0044196.s007.pdf [file pone.0044196.s007.pdf]

**Table S1. Fine-mapping known K562 translocations.**

| Source                            | Reported K562 translocation | Evidence in Hi-C data? | Breakpoint region (hg18)                                      | Annotated gene closest to predicted breakpoint                                                                      |
|-----------------------------------|-----------------------------|------------------------|---------------------------------------------------------------|---------------------------------------------------------------------------------------------------------------------|
| K562 Karyotype [1]                | t(9;22)                     | Yes                    | chr9:132,550,000–132,600,000<br>chr22:21,950,000–22,000,000   | chr9: <i>ABL1</i><br>chr22: <i>BCR</i>                                                                              |
|                                   | t(3;10)                     | Yes                    | chr3:48,150,000 – 48,200,000<br>chr10:87,800,000 – 87,850,000 | chr3: <i>CDC25A</i> (cell cycle division 25A isoform A)<br>chr10: <i>GRID1</i>                                      |
|                                   | t(10;17)                    | Yes                    | chr10:42,200,000–42,250,000<br>chr17:22,150,000–22,200,000    | chr10: <i>BC039000</i> (Homo sapiens cyclin Y-like 2)<br>chr17: enhancer marks in K562                              |
|                                   | t(9;17)                     | Yes                    | chr9:20,150,000–20,200,000<br>chr17:22,150,000–22,200,000     | chr9: <i>MLLT3</i> (myeloid/lymphoid or mixed-lineage leukemia, translocated to 3)<br>chr17: enhancer marks in K562 |
|                                   | t(5;6)                      | Yes                    | chr5:69,000,000–69,050,000<br>chr6:27,000,000–27,050,000      | chr5: <i>GUSBP3</i><br>chr6: <i>GUSBP1</i>                                                                          |
|                                   | t(9;13)                     | No                     | -                                                             | -                                                                                                                   |
|                                   | t(1;21)                     | No                     | -                                                             | -                                                                                                                   |
|                                   | t(2;19)                     | No                     | -                                                             | -                                                                                                                   |
|                                   | t(19;20)                    | No                     | -                                                             | -                                                                                                                   |
|                                   | t(6;11)                     | No                     | -                                                             | -                                                                                                                   |
| t(12;19)                          | No                          | -                      | -                                                             |                                                                                                                     |
| K562 Next-Gen Sequencing [2, 3],* | t(9;22) 2                   | Yes                    | chr9: 133,050,000–133,100,000<br>chr22: 15,650,000–15,700,000 | chr9: <i>NUP214</i><br>chr22: <i>XKR3</i>                                                                           |
|                                   | t(1;11)                     | No                     | -                                                             | -                                                                                                                   |

\*Targeted sequencing of 476 cancer-related gene cDNA transcripts only; did not detect non-coding breakpoints or translocations affecting other genes.

1. Naumann S, Reutzel D, Speicher M, Decker HJ. (2001) Complete karyotype characterization of the K562 cell line by combined application of G-banding, multiplex-fluorescence in situ hybridization, fluorescence in situ hybridization, and comparative genomic hybridization. *Leuk Res* 25: 313-22.
2. Ge H, Liu K, Juan T, Fang F, Newman M, Hoeck W. (2011) FusionMap: detecting fusion genes from next-generation sequencing data at base-pair resolution. *Bioinformatics* 27: 1922-1928.
3. Levin JZ, Berger MF, Adiconis X, Rogov P, Melnikov A, Fennell T, Nusbaum C, Garraway LA, Gnirke A. (2009) Targeted next-generation sequencing of a cancer transcriptome enhances detection of sequence variants and novel fusion transcripts. *Genome Biol* 10: R115.
