# Supplementary material for: Three-Dimensional Genome Architecture Influences Partner Selection for Chromosomal Translocations in Human Disease
Source: PubMed Central journal article supplement (PMC3460994; doi:10.1371/journal.pone.0044196), 2012-09-28
Supplement: pone.0044196.s009.pdf [file pone.0044196.s009.pdf]

**Table S2. Individual translocation-prone loci that significantly colocalize in normal nuclei.**

| Dataset           | Karyotype              | Permutation |                                                     |
|-------------------|------------------------|-------------|-----------------------------------------------------|
|                   |                        | P-Value     | Disease                                             |
| Mitelman Database | t(12;19)(p13;p13)      | <0.001      | Acute lymphoblastic leukemia/lymphoblastic lymphoma |
|                   | t(12;21)(p13;q22)      | <0.001      | Acute lymphoblastic leukemia/lymphoblastic lymphoma |
|                   | t(3;12)(p21;p13)       | <0.001      | Acute lymphoblastic leukemia/lymphoblastic lymphoma |
|                   | t(7;12)(p15;p13)       | <0.001      | Acute myeloid leukemia, NOS                         |
|                   | t(3;19)(p21;p13)       | <0.001      | Acute lymphoblastic leukemia/lymphoblastic lymphoma |
|                   | tas(19;22)(q13;q13)    | <0.001      | Giant cell tumor of bone                            |
|                   | t(X;4)(p22;p12)        | <0.001      | Mantle cell lymphoma                                |
| Multiple Myeloma  | t(4;14)(p16.3;q32.33)  | <0.001      | Multiple myeloma                                    |
|                   | t(17;20)(p13.3;q11.22) | <0.001      | Multiple myeloma                                    |
| Prostate Cancer   | none                   | -           | -                                                   |
| Mendelian Disease | t(9;20)(q34;q11)mat    | <0.001      | Azoospermia/Oligozoospermia                         |
